# Supplementary material
Source: publisher site journal article supplement (https://static.cambridge.org/content/id/urn:cambridge.org:id:article:S0007114521004153/resource/name/S0007114521004153supp001.pdf)

# Supplementary Figure 1

## CONSORT 2010 Flow Diagram

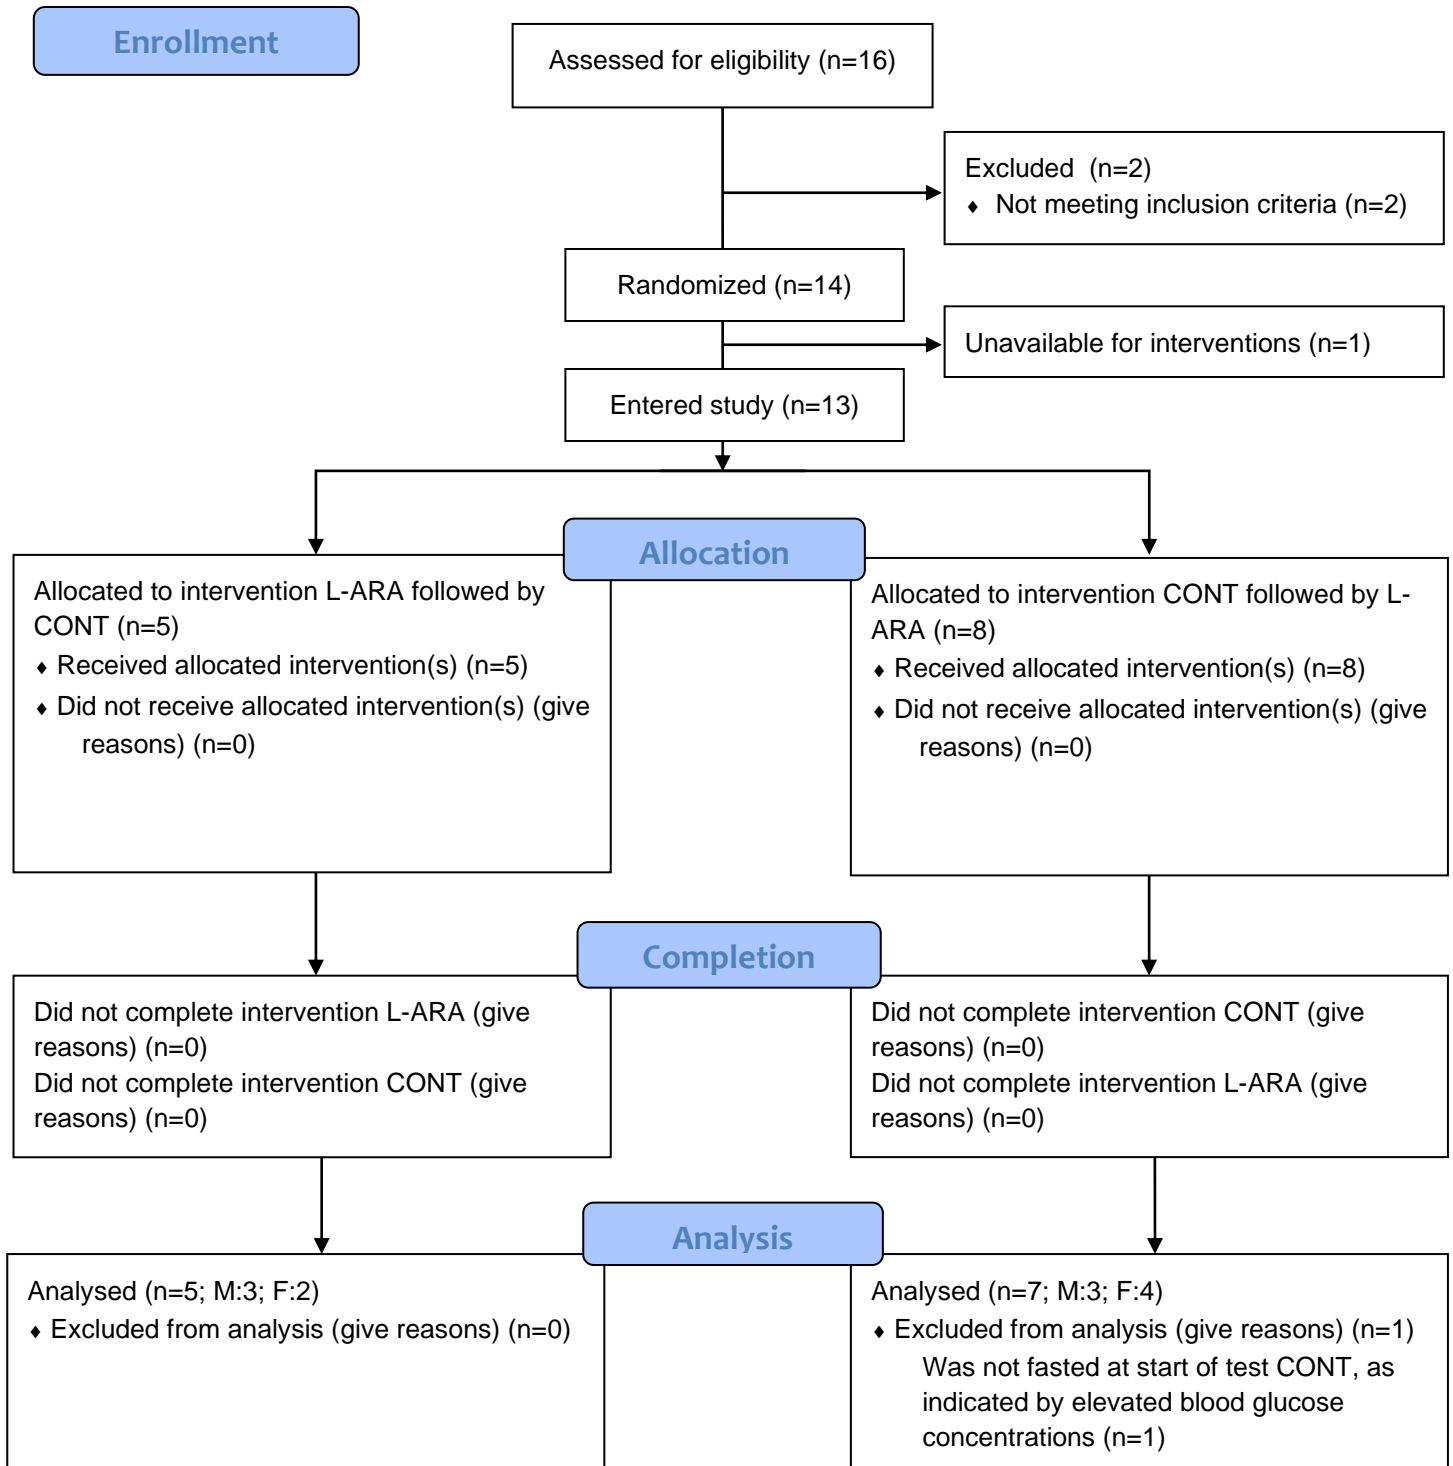

Supplement: Supplementary file 1 [file S0007114521004153supp001.pdf]
